# Supplementary material for: The catalytic activity and adsorption in faujasite and ZSM-5 zeolites: the role of differential stabilization and charge delocalization
Source: Royal Society of Chemistry journal article supplement (doi:10.1039/d1cp05851g), 2022-01-01
Supplement: d1cp05851g1.pdf [file d1cp05851g1.pdf]

## The catalytic activity and adsorption in faujasite and ZSM-5 zeolites: the role of differential stabilization and charge delocalization

Taiji Nakamura, Dmitri G. Fedorov\*

Research Center for Computational Design of Advanced Functional Materials (CD-FMat), National Institute of Advanced Industrial Science and Technology (AIST), Central 2, Umezono 1-1-1, Tsukuba, 305-8568, Japan.

\* Corresponding author:

Definition of harmonic vibrational terms.

$$E_{\text{ZPE}} = \sum_{a=1}^K R \frac{\tilde{\nu}_a}{2} \quad (1)$$

$$H^T = \sum_{a=1}^K R \frac{\tilde{\nu}_a}{\exp(\tilde{\nu}_a/T) - 1} \quad (2)$$

$$S = \sum_{a=1}^K R \left[ \frac{\tilde{\nu}_a/T}{\exp(\tilde{\nu}_a/T) - 1} - \ln(1 - \exp(-\tilde{\nu}_a/T)) \right] \quad (3)$$

$$G = E_{\text{ZPE}} + H^T - TS = H - TS \quad (4)$$

where  $a$  numbers vibrational modes with frequencies  $\nu_a$ ,  $\tilde{\nu}_a = h\nu_a/k$ ,  $h$  is the Plank's constant,  $k$  is the Boltzmann's constant,  $R$  is the gas constant and  $T$  is the temperature.  $K$  is the number of normal modes.

The absolute values of thermodynamic quantities are subtracted to compute binding contributions such as  $\Delta G$  (subtracting the values for the complex and isolated systems).

Table S1. Adsorption energy (kcal/mol) for the most stable and second isomer ZSM-5 at the full DFTB/PBC level.

| Adsorbed molecule | Most stable isomer | Second isomer |
|-------------------|--------------------|---------------|
| Water             | -10.1              | -10.8         |
| Methanol          | -17.9              | -16.0         |
| Ethanol           | -25.9              | -22.2         |
| Propanol          | -32.1              | -26.4         |

Table S2. The energies of transition states (TS) and intermediates (I) plotted in Fig. 7.

| Stationary point | $\Delta E$ | $\Delta H_{\text{ZPE}}$ | $\Delta H$ | $\Delta G$ |
|------------------|------------|-------------------------|------------|------------|
| Reactants        | 0.0        | 0.0                     | 0.0        | 0.0        |
| I1               | -35.3      | -35.2                   | -30.1      | -41.6      |
| TS1              | -13.9      | -14.1                   | -10.1      | -17.3      |
| I2               | -47.4      | -42.5                   | -41.1      | -40.9      |
| TS2              | -42.1      | -44.6                   | -42.0      | -44.9      |
| I3               | -55.1      | -50.9                   | -49.4      | -49.5      |
| TS3              | -38.2      | -37.8                   | -34.7      | -39.8      |
| I4               | -50.0      | -48.4                   | -45.1      | -50.6      |
| TS4              | -40.2      | -40.6                   | -37.0      | -42.6      |
| I5               | -66.9      | -62.8                   | -60.2      | -63.0      |
| TS5              | -59.1      | -58.9                   | -55.5      | -60.5      |
| I6               | -80.5      | -78.7                   | -74.7      | -82.3      |
| TS6              | -77.0      | -77.7                   | -73.7      | -80.7      |
| I7               | -89.8      | -84.8                   | -82.2      | -86.1      |
| TS7              | -87.6      | -88.3                   | -84.2      | -92.4      |
| I8               | -105.7     | -102.2                  | -97.8      | -106.3     |
| Products         | -68.5      | -69.1                   | -68.4      | -74.7      |

If the reaction is analyzed based on  $\Delta H_{\text{ZPE}}$ ,  $\Delta H$ , or  $\Delta G$ , the barriers for TS2 and TS7 disappear.

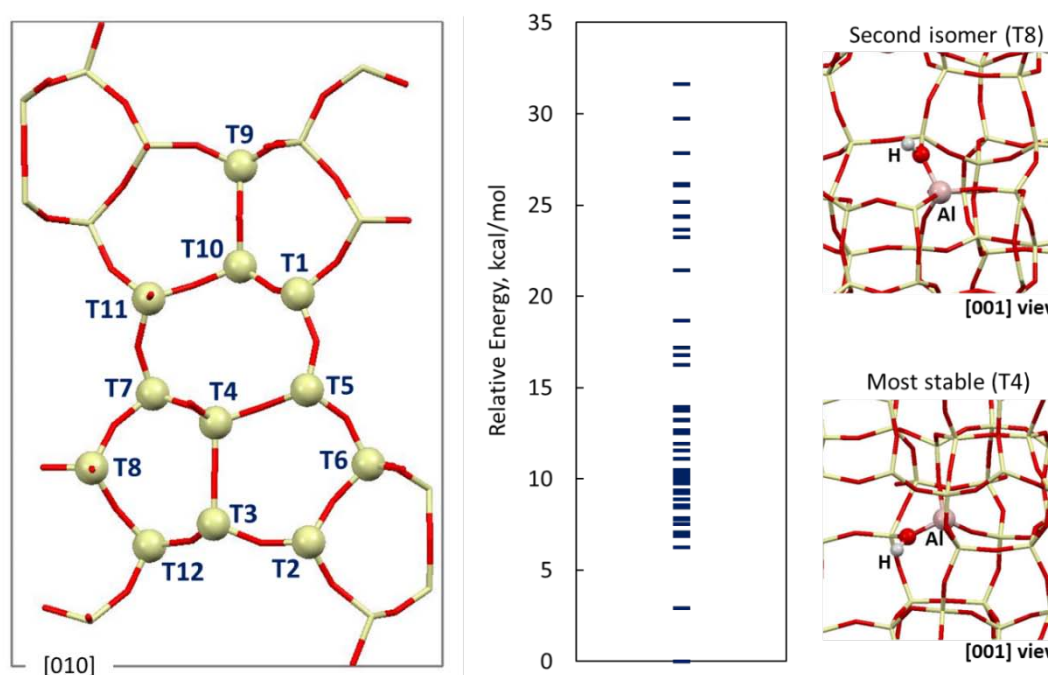

Figure S1. Position of all 12 distinct T sites (T1-T12) in ZSM-5 structure and relative stability of 48 isomers of H-ZSM-5 (every T site has 4 adjacent oxygens that can be protonated).

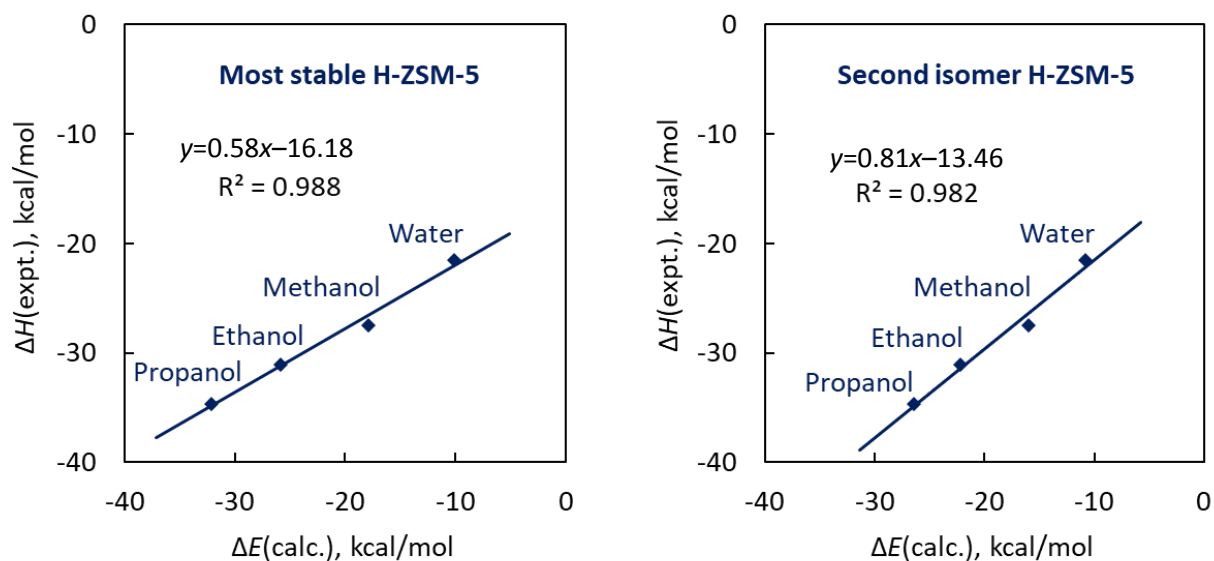

Figure S2. Correlation between the experimental<sup>1</sup> and calculated adsorption energy at the full DFTB/PBC level for the most stable and second isomers of H-ZSM-5 (isomers refer to Al sites).

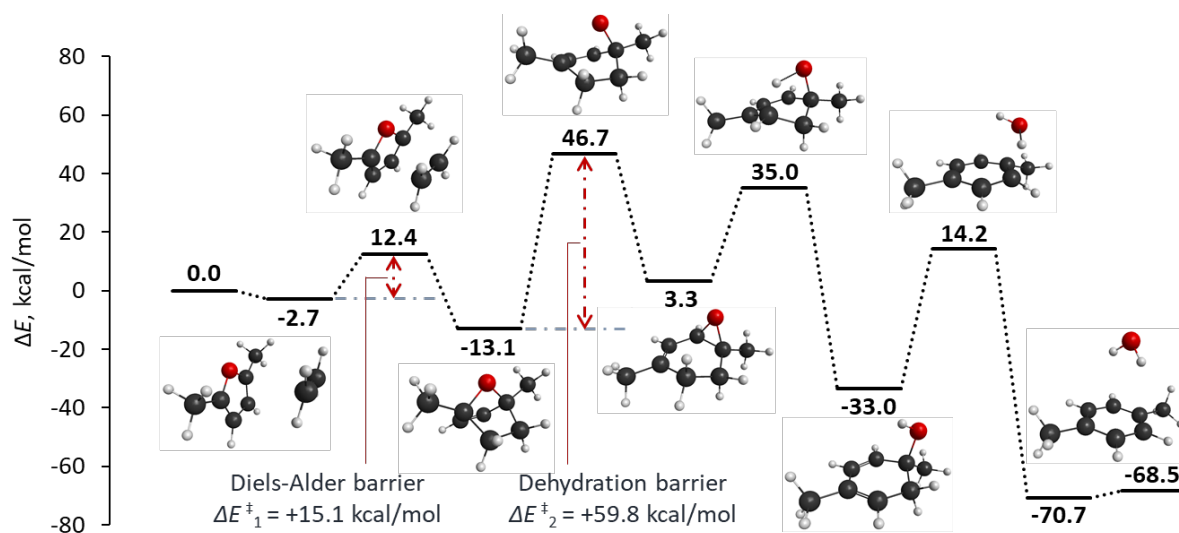

Figure S3. Reaction profile of the non-catalytic *p*-xylene production from 2,5-dimethylfuran (DMF) and ethylene at the DFTB level. Note that no zeolite is used in these reactions.

## References

<sup>1</sup> C.-C. Lee, R. J. Gorte and W. E. Farneth, *J. Phys. Chem. B* 1997, **101**, 3811–3817.
